# Supplementary material for: A vacancy-rich perovskite fluoride K0.79Ni0.25Co0.36Mn0.39F2.83@rGO anode for advanced Na-based dual-ion batteries
Source: Royal Society of Chemistry journal article supplement (doi:10.1039/d1cc01477c), 2021-01-01
Supplement: d1cc01477c1.pdf [file d1cc01477c1.pdf]

## SUPPORTING INFORMATION

---

### Supporting Information

#### **A vacancy-rich perovskite fluoride $K_{0.79}Ni_{0.25}Co_{0.36}Mn_{0.39}F_{2.83}@rGO$ anode for advanced Na-based dual-ion batteries**

Caini Tan<sup>a</sup>, Rui Ding<sup>\*a</sup>, Yuxi Huang<sup>a</sup>, Tong Yan<sup>a</sup>, Yongfa Huang<sup>a</sup>, Feng Yang<sup>a</sup>,  
Xiujuan Sun<sup>a</sup>, Ping Gao<sup>a</sup>, and Enhui Liu<sup>a</sup>

<sup>a</sup> Key Laboratory of Environmentally Friendly Chemistry and Applications of Ministry  
of Education, College of Chemistry, Xiangtan University, Xiangtan, Hunan 411105,  
P.R. China

**\*Corresponding Author**

\*E-mails: [drm8122@163.com](mailto:drm8122@163.com); [drm8122@xtu.edu.cn](mailto:drm8122@xtu.edu.cn)

## Supporting Information

| Table of contents           |                                                                                                                                                                                                                                                                                                                  |      |
|-----------------------------|------------------------------------------------------------------------------------------------------------------------------------------------------------------------------------------------------------------------------------------------------------------------------------------------------------------|------|
| <b>Experimental section</b> | Synthesis of materials, characterizations, electrochemical measurements, and calculations for $C_m$ , $E_m$ , and $P_m$ .                                                                                                                                                                                        | P4-6 |
| <b>Figure S1</b>            | The crystal structures of perovskite $KMF_3$ and detailed crystalline parameters for $KNiF_3$ , $KCoF_3$ , and $KMnF_3$ .                                                                                                                                                                                        | P7   |
| <b>Figure S2</b>            | SEM (a), TEM (b), HRTEM (c), SAED(d), mapping (e-l) of the $KNCMF@rGO$ candidate.                                                                                                                                                                                                                                | P8   |
| <b>Figure S3</b>            | SEM and TEM images of the $KNCMF@rGO$ Sample.                                                                                                                                                                                                                                                                    | P9   |
| <b>Figure S4</b>            | EDS of the $KNCMF@rGO$ Sample.                                                                                                                                                                                                                                                                                   | P10  |
| <b>Figure S5</b>            | ICP of the $KNCMF@rGO$ Sample.                                                                                                                                                                                                                                                                                   | P11  |
| <b>Figure S6</b>            | TG/DTG curves of the $KNCMF@rGO$ Sample.                                                                                                                                                                                                                                                                         | P12  |
| <b>Figure S7</b>            | $N_2$ isothermal sorptions (a), pore volumes (b), and pore size distributions of the $KNCMF@rGO$ Sample (c).                                                                                                                                                                                                     | P13  |
| <b>Figure S8</b>            | CV plots for the first three cycles at $0.3 \text{ mV s}^{-1}$ of $KNF@rGO$ electrode (a); $KCF@rGO$ electrode (b); and $KMF@rGO$ electrode (c).                                                                                                                                                                 | P14  |
| <b>Figure S9</b>            | Specific capacity (a) and cycling stability (b) of $KNF@rGO$ , $KCF@rGO$ , $KMF@rGO$ , and $KNCMF@rGO$ electrode (the cycle test used a new cell).                                                                                                                                                               | P15  |
| <b>Figure S10</b>           | XRD patterns of $KNCF@rGO$ , $KCMF@rGO$ and $KNMF@rGO$ samples (a), Specific capacity (b) and cycling stability (c) of $KNMF@rGO$ , $KNCF@rGO$ , $KCMF@rGO$ , $KNF@rGO$ , $KCF@rGO$ and $KMF@rGO$ electrodes.                                                                                                    | P16  |
| <b>Figure S11</b>           | GCD curves of the $KNCMF@rGO$ electrodes.                                                                                                                                                                                                                                                                        | P17  |
| <b>Figure S12</b>           | CV plots at $0.1-1.0 \text{ mV s}^{-1}$ (a); plots of $\lg i$ vs. $\lg v$ (b); the pseudocapacitive contribution at a scan rate of $0.5 \text{ mV s}^{-1}$ (c); and charge contributions by the diffusion-controlled and pseudocapacitive contribution at different scan rates (d) of the $KNCMF@rGO$ electrode. | P18  |
| <b>Figure S13</b>           | Pseudocapacitive contribution map at $0.1$ (a), $0.2$ (b), $0.3$ (c), $0.5$ (d), $0.8$ (e), and $1.0$ (c) $\text{mV s}^{-1}$ .                                                                                                                                                                                   | P19  |
| <b>Figure S14</b>           | Ex-situ XPS spectra of the $KNCMF@rGO$ electrode in pristine, discharged- $0.01 \text{ V}$ and charged- $3.0 \text{ V}$ states during the first discharged/ charged cycle at $0.02 \text{ A g}^{-1}$ : survey (a), $C1s$ (b) and $O1s$ (c).                                                                      | P20  |
| <b>Figure S15</b>           | Ex-situ XRD in pristine and first fully discharged/charged states of the $KNCMF@rGO$ electrode.                                                                                                                                                                                                                  | P21  |
| <b>Figure S16</b>           | Schematics of reaction mechanisms for the $KNCMF@rGO$ electrode during the discharging/charging processes under the first two cycles (a); Crystalline structure information of Ni, Co, Mn, $NiF_2$ , $CoF_2$ , $MnF_2$ , NaF, KF, and $Na_2CO_3$ phases (b), and reaction equation 1-7 (c).                      | P22  |

|                   |                                                                                                                                                               |     |
|-------------------|---------------------------------------------------------------------------------------------------------------------------------------------------------------|-----|
| <b>Figure S17</b> | Electrochemical performance of KS6 electrode.                                                                                                                 | P23 |
| <b>Figure S18</b> | Specific capacity at 0.5-8 A g <sup>-1</sup> (a) (c) (e), GCD curves at 0.5-8.0 A g <sup>-1</sup> (b) (d) (f) of the KNCMF@rGO//KS6(1:1/1:..5/1.5:1) Na-DIBs. | P24 |
| <b>Figure S19</b> | Electrochemical performance of the Na-DIBs (KNCMF@rGO//KS6) under low (-20 °C) temperature.                                                                   | P25 |
| <b>Figure S20</b> | Electrochemical performance of the Na-DIBs (KNCMF@rGO//KS6) under high (40 °C) temperature.                                                                   | P26 |
| <b>Table S1</b>   | Materials, chemicals and reagents used in this study.                                                                                                         | P27 |
| <b>Table S2</b>   | Specific capacity and cycling retention of the KNCMF@rGO electrode.                                                                                           | P28 |
| <b>Table S3</b>   | Specific capacity, rate capability and cycling retention of KNCMF@rGO, KNMF@rGO, KNCF@rGO, KCMF@rGO, KNF@rGO, KCF@rGO and KMF@rGO electrodes.                 | P29 |
| <b>Table S4</b>   | Specific capacity and cycling retention of the KS6 electrode.                                                                                                 | P30 |
| <b>Table S5</b>   | Comparison of electron binding energy of K2p and F1s.                                                                                                         | P31 |
| <b>Table S6</b>   | Performance summary of the Na-DIBs in the study under room temperature (25 °C).                                                                               | P32 |
| <b>Table S7</b>   | Performance summary of the Na-DIBs in the study under low (-20 °C) and high (40 °C) temperature.                                                              | P33 |
| <b>Table S8</b>   | A comparison for the performance of the KNCMF@rGO//KS6 in the study with some reported Na (Li)-DIBs                                                           | P34 |
| <b>References</b> | References.                                                                                                                                                   | P35 |

## Synthesis of KNCMF@rGO materials

Analytical/guaranteed reagents (AR/GR) were directly used in the experiment (Table S1). The KNCMF@rGO(Ni:Co:Mn=1:1:1) sample was synthesized via a facile one-pot solvothermal route. Firstly, 60 mg graphene oxides (GO) powder was dispersed in 32 mL ethylene glycol (EG) solvents with an ultrasonic bath for 2 h at 100 W. Secondly, 0.66 mmol NiCl<sub>2</sub>•6H<sub>2</sub>O, 0.66 mmol CoCl<sub>2</sub>•6H<sub>2</sub>O, 0.66 mmol MnCl<sub>2</sub>•4H<sub>2</sub>O, 5 mmol KF•2H<sub>2</sub>O, and 0.20 g PVP-K30 were dissolved into GO solution, and then the mixture was magnetically stirred thoroughly and dispersed well in an ultrasonic bath for 30 min at 100 W. Thirdly, the mixture was transferred into a 50 mL Teflon-lined stainless steel autoclave, which was heated at 180 °C for 12 h in an electric oven, and then cooled down naturally. Next, the yielded precipitates were collected after being centrifuged along with absolute alcohol washing for several times. Finally, the precipitates were dried overnight at 95 °C to obtain the products. The synthesis procedure of KNMF@rGO(Ni: Mn=1: 1), KCMF@rGO(Co:Mn=1:1), KNCF@rGO(Ni:Co =1:1), KNiF@rGO, KCoF@rGO and KMnF@rGO are the same as KNCMF@rGO(Ni:Co:Mn=1:1:1) except for the molar ratio of Ni, Co, and Mn slats.

## Characterizations

The phases and crystallinity properties were determined by X-ray diffraction (XRD). The morphology and size of particles were analyzed by scanning electron microscopy (SEM) and transmission electron microscopy (TEM). The crystalline microstructures were resolved by the high-resolution TEM (HRTEM) and selected area electron diffraction (SAED). The element composition and distribution were measured by the X-ray energy dispersive spectra (EDS), inductively coupled plasma-optical emission spectrometer (ICP-OES) and mapping. The surface chemical compositions and electronic structures were checked by X-ray photoelectron spectra (XPS). The specific surface area, pore volume and size distribution were examined by nitrogen isothermal sorptions with Brunauer-Emmett-Teller (BET) and Barrett-Joyner-Halenda (BJH) methods. The existence and content of reduction graphene oxide were analyzed by

Thermogravimetric analysis (TG) and differential Thermogravimetric (DTG).

## Electrochemical measurements

The electrodes were prepared by the following two steps: firstly, a well-dispersed mixture of 70 wt% active materials, 10 wt% acetylene black (AB) conductive agent/10 wt% superconductive carbon black (for KNCMF@rGO electrode while 20 wt% superconductive carbon for KS6 electrode, respectively), and 10 wt% polyvinylidene fluoride binder (PVDF, which was dissolved in N-methyl-2-pyrrolidone (NMP)). The KNCMF@rGO and KS6 paste was respectively cast onto the current collectors of Cu foil as the anode and carbon-coated Al foil as the cathode, followed by drying in a vacuum oven at 110 °C for 12 h; secondly, the electrodes were punched into disks with a diameter of 12 mm, and the mass loading of active materials was about 1-2 mg cm<sup>-2</sup>. The electrolytes used for KNCMF@rGO, KS6 electrodes, and Na-DIBs were 0.85 M NaPF<sub>6</sub> dissolved in the mixed solvents of ethylene carbonate (EC), ethyl methyl carbonate (EMC) and diethyl carbonate (DEC) (1 : 1 : 1 in volume) with 5 % fluoroethylene carbonate (FEC) additive (Na206-181224, MJS); all cell assemblies were performed in a high pure Ar-filled dry glovebox (MIKROUNA, O<sub>2</sub> and H<sub>2</sub>O < 0.1 ppm) and all tests were carried out at room temperature (about 25 °C) except the assigned tests at high (40 °C) and low (-20 °C) temperatures (more detailed information about the above mentioned chemicals, agents, and materials can be seen in **Table S1**). We used the same cell to test the specific capacity at 0.02-1-0.02 A g<sup>-1</sup> and cycling at 0.3 A g<sup>-1</sup> for 500 cycles (before testing the cycling the cell was laid aside for 3 hours) of KNCMF@rGO electrode. Furthermore, we used a new cell to test the cycling (0.5 A g<sup>-1</sup>/500 cycles) of the KNCMF@rGO, KNMF@rGO, KNCF@rGO, KCMF@rGO, KNF@rGO, KCF@rGO and KMF@rGO electrodes.

### Calculations for $C_m$ , $E_m$ , $P_m$

The specific capacity ( $C_m$ , mAh g<sup>-1</sup>), energy density ( $E_m$ , Wh kg<sup>-1</sup>), and power density ( $P_m$ , kW kg<sup>-1</sup>) for Na-DIBs were calculated according to the **Equations S(1)-S(3)**.

$$C_m = Q_m / 3.6 \quad \text{S(1)}$$

$$E_m = \int_0^{C_m} V dC_m \quad \text{S(2)}$$

$$P_m = 3.6 E_m / t_d \quad \text{S(3)}$$

Where  $m$ ,  $Q_m$ ,  $V$  and  $t_d$  refer to the mass of active materials (mg, for half cells, it means the mass of active materials of anode or cathode; for Na-DIBs full cells, it means the total mass of active materials of anode and cathode), specific charge or discharge quantity (C g<sup>-1</sup>, for anode, it means the charge quantity; for cathode and full cells, it refers to the discharging quantity), Voltage (V), and discharging time (s), respectively.

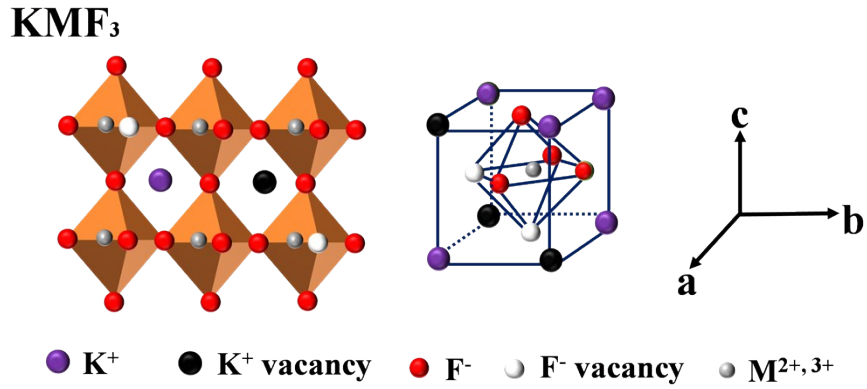

| Sample                  | ICSD-PDF       | Crystal system | Space group         | Cell (a×b×c)/Å <sup>3</sup> |
|-------------------------|----------------|----------------|---------------------|-----------------------------|
| <b>KNiF<sub>3</sub></b> | <b>21-1002</b> | <b>Cubic</b>   | <b><i>Pm-3m</i></b> | <b>4.0127×4.0127×4.0127</b> |
| <b>KCoF<sub>3</sub></b> | <b>18-1006</b> | <b>Cubic</b>   | <b><i>Pm-3m</i></b> | <b>4.0708×4.0708×4.0708</b> |
| <b>KMnF<sub>3</sub></b> | <b>17-0116</b> | <b>Cubic</b>   | <b><i>Pm-3m</i></b> | <b>4.1890×4.1890×4.1890</b> |

**Figure S1.** The crystal structures of perovskite KMF<sub>3</sub> and detailed crystalline parameters for KNiF<sub>3</sub>, KCoF<sub>3</sub>, and KMnF<sub>3</sub>.

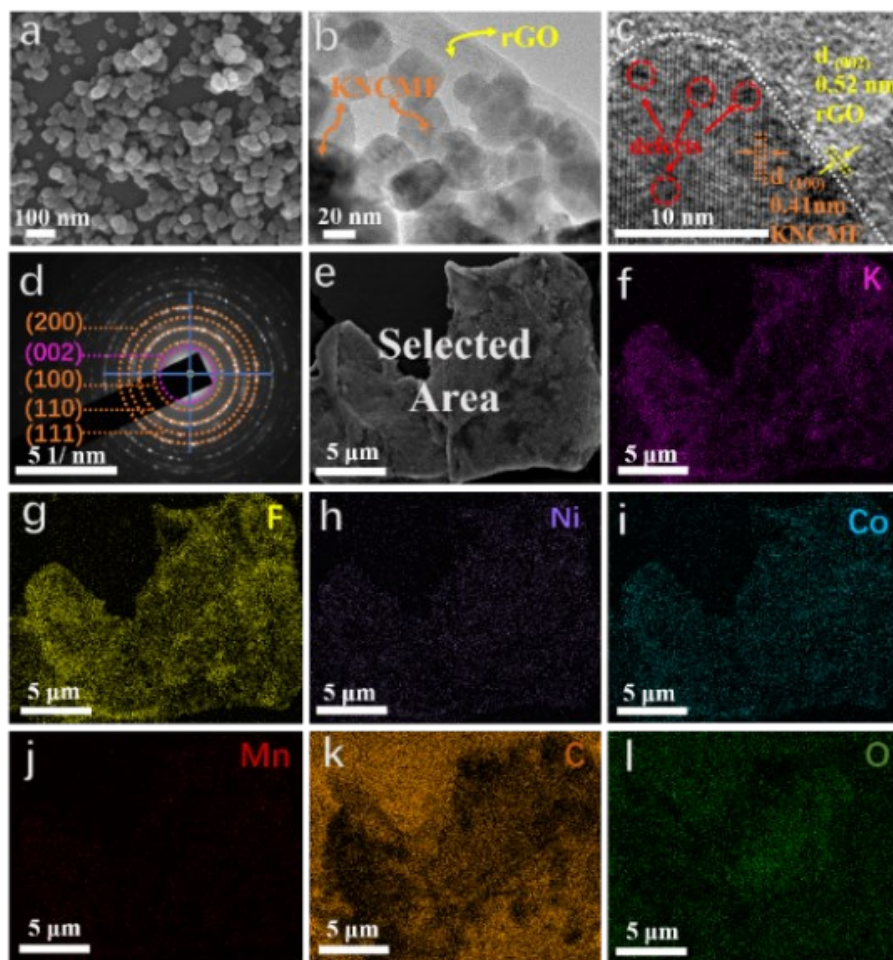

**Figure S2.** SEM (a), TEM (b), HRTEM (c), SAED(d), mapping (e-l) of the KNCMF@rGO candidate.



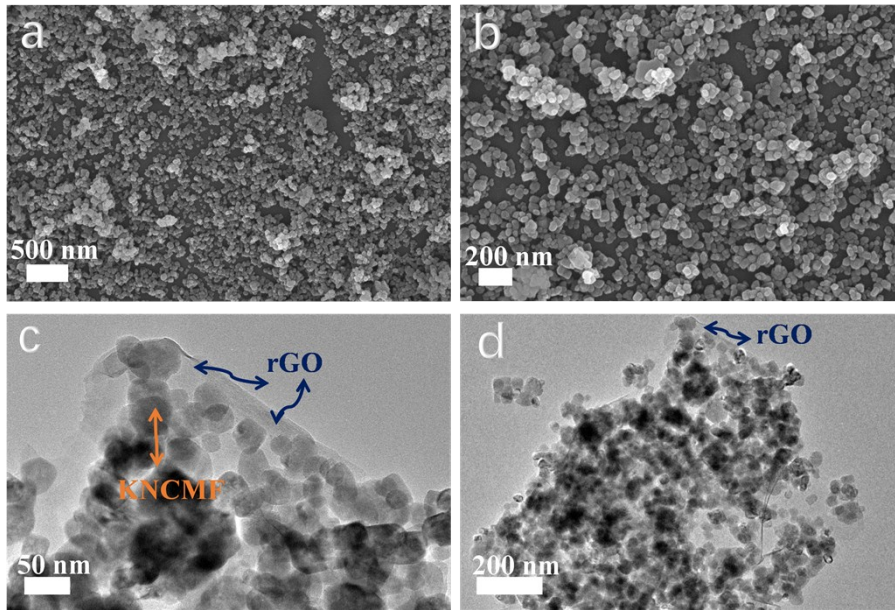

**Figure S3.** SEM and TEM images of the KNCMF@rGO Sample.

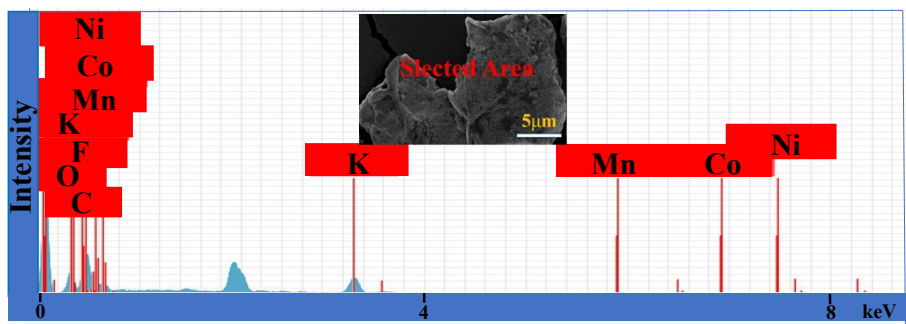

**Figure S4.** EDS of the KNCMF@rGO Sample.

| <b>Result from ICP-OES</b> |                                                                 |
|----------------------------|-----------------------------------------------------------------|
| <b>Element</b>             | <b>Wt.%</b>                                                     |
| <b>K</b>                   | <b>21.79</b>                                                    |
| <b>Ni</b>                  | <b>10.36</b>                                                    |
| <b>Co</b>                  | <b>14.87</b>                                                    |
| <b>Mn</b>                  | <b>15.27</b>                                                    |
| <b>Formula</b>             | <b><math>K_{0.79}Ni_{0.25}Co_{0.36}Mn_{0.39}F_{2.83}</math></b> |

**Figure S5.** ICP of the KNCMF@rGO Sample.

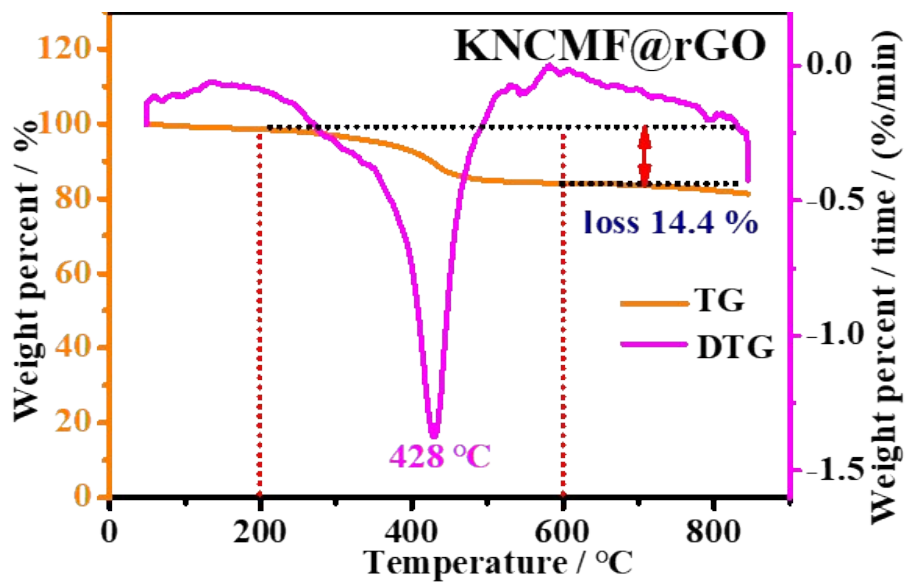

Figure S6. TG/DTG curves of the KNCMF@rGO Sample.

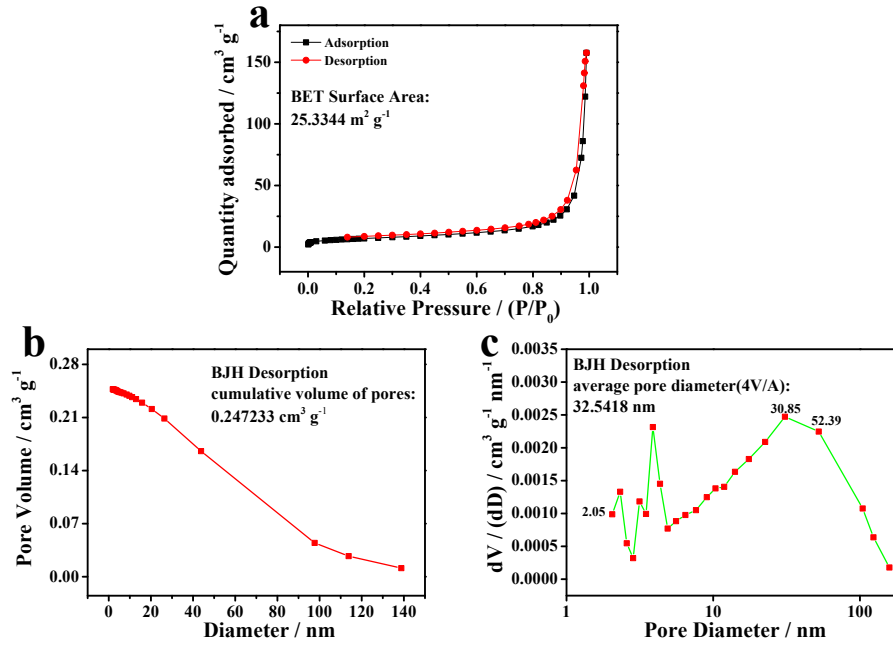

**Figure S7.**  $\text{N}_2$  isothermal sorptions (a), pore volumes (b), and pore size distributions (c) of the KNCMF@rGO Sample.

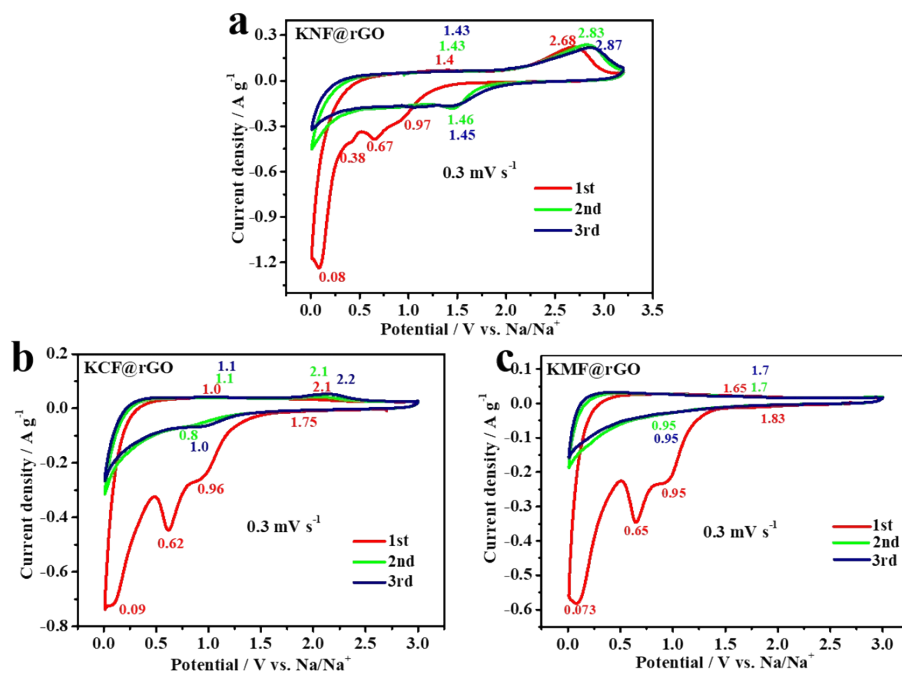

**Figure S8.** CV plots for the first three cycles at  $0.3 \text{ mV s}^{-1}$  of KNF@rGO electrode (a); KCF@rGO electrode (b); and KMF@rGO electrode (c).

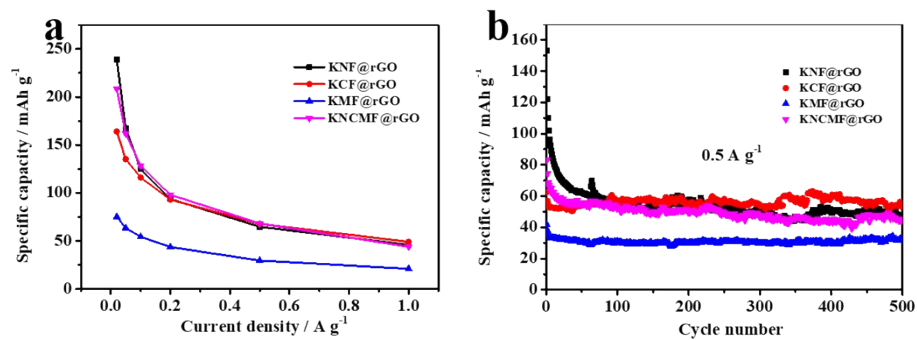

**Figure S9.** Specific capacity (a) and cycling stability (b) of KNF@rGO, KCF@rGO, KMF@rGO, and KNCMF@rGO electrode.

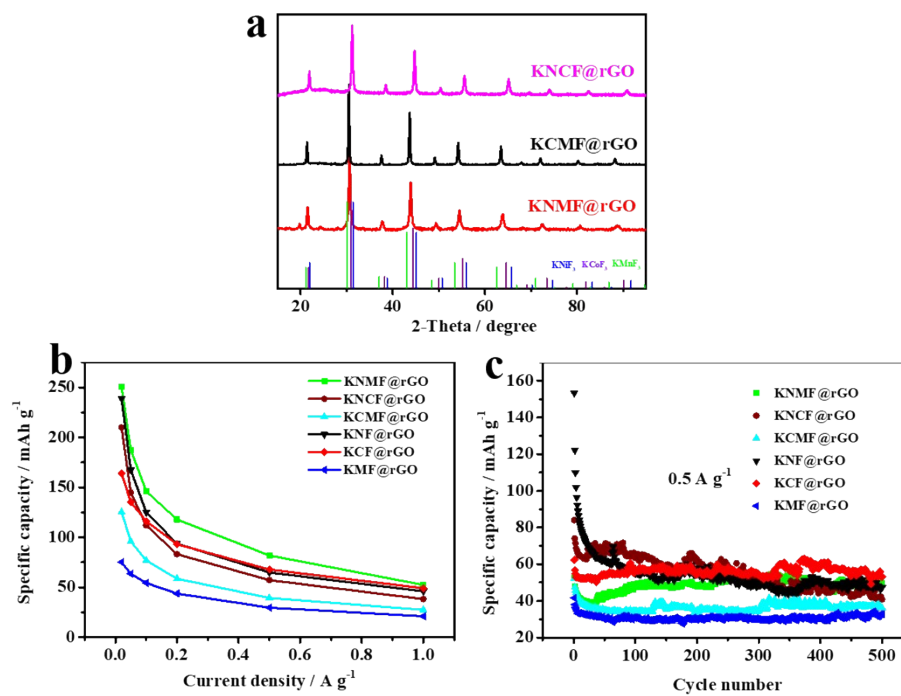

**Figure S10.** XRD patterns of KNCF@rGO, KCMF@rGO and KNMF@rGO samples (a), specific capacity (b) and cycling stability (c) of KNMF@rGO, KNCF@rGO, KCMF@rGO, KNF@rGO, KCF@rGO and KMF@rGO electrodes.



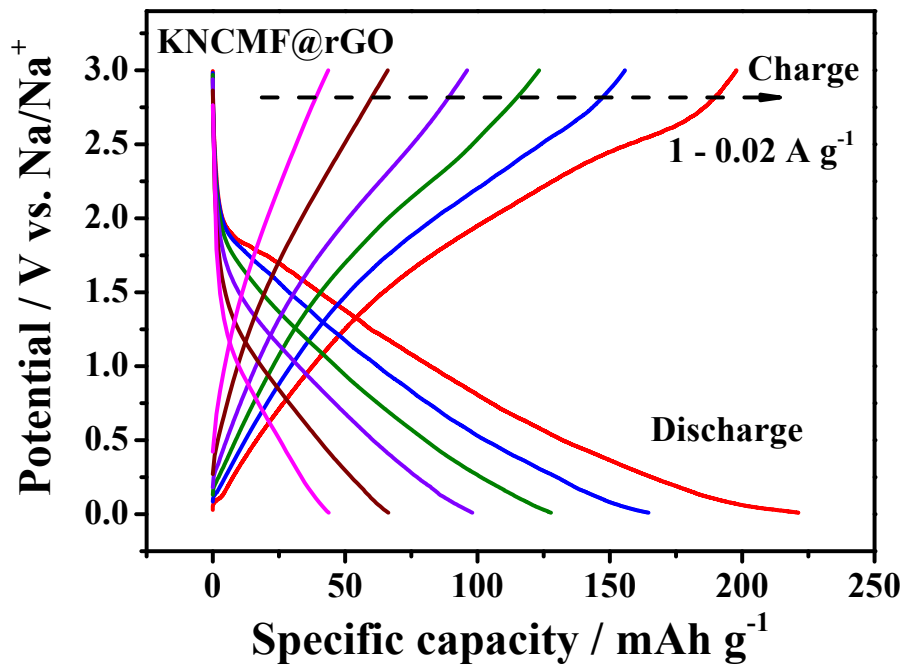

Figure S11. GCD curves of the KNCMF@rGO electrode.

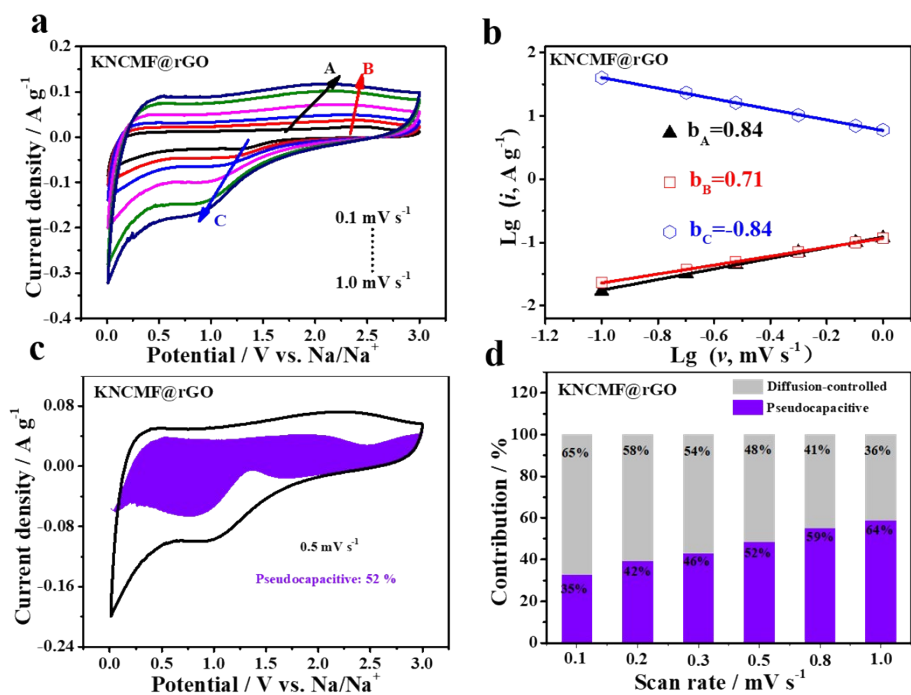

**Figure S12.** CV plots at 0.1-1.0  $mV s^{-1}$ (a); plots of  $lgi$  vs.  $lgv$  (b); the pseudocapacitive contribution at a scan rate of 0.5  $mV s^{-1}$  (c); and charge contributions by the diffusion-controlled and pseudocapacitive contribution at different scan rates (d) of the KNCMF@rGO electrode.

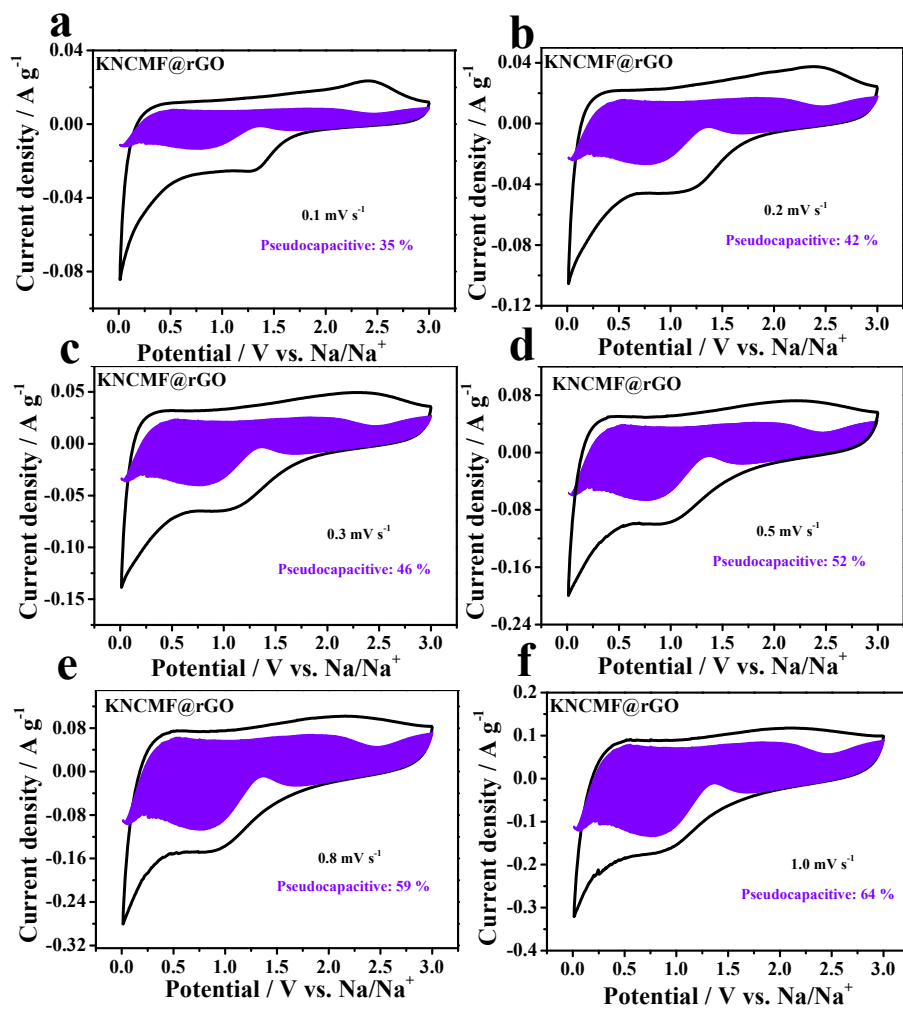

Figure S13. Pseudocapacitive contribution map at 0.1-1.0 mV s<sup>-1</sup> (a)-(f).

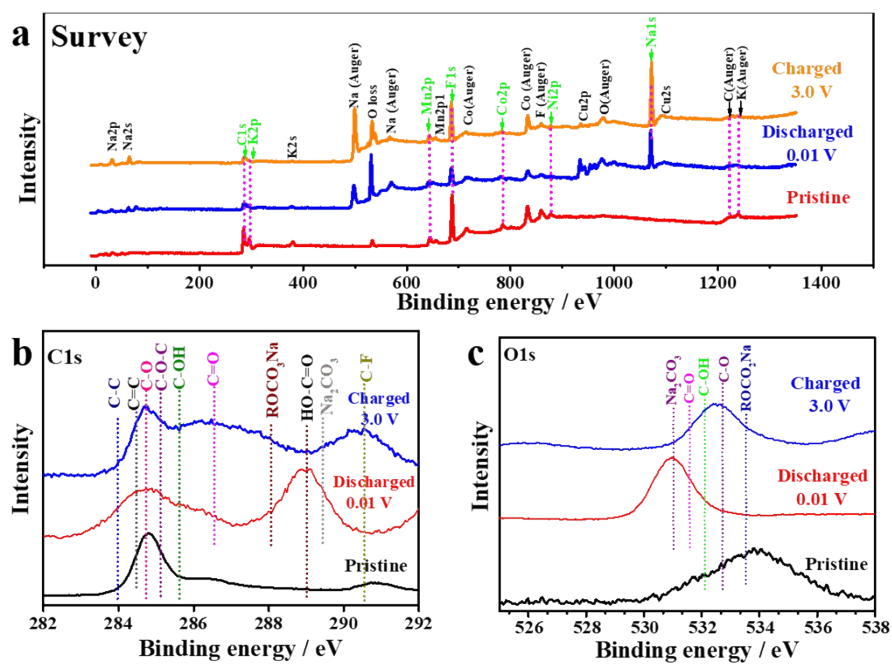

**Figure S14.** Ex-situ XPS spectra of the KNCMF@rGO electrode in pristine, discharged-0.01 V and charged-3.0 V states during the first discharged/charged cycle at  $0.02 \text{ A g}^{-1}$ : survey (a), C1s (b) and O1s (c).

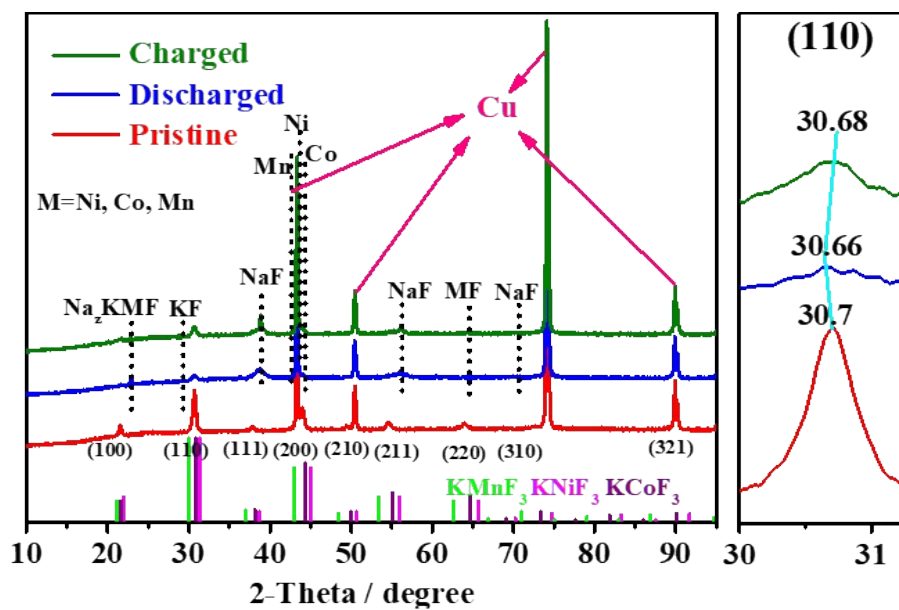

**Figure S15.** Ex-situ XRD in pristine and first fully discharged/charged states of the KNCMF@rGO electrode.

(a)

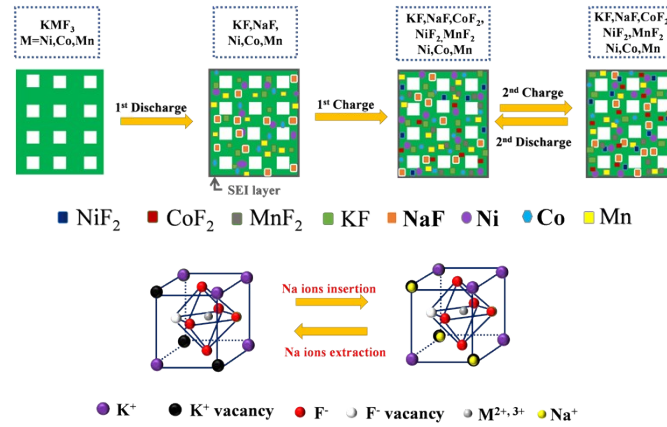

(b)

| Phases                   | PDF Card | Crystal system | Space group | Cell (a×b×c)/Å <sup>3</sup> |
|--------------------------|----------|----------------|-------------|-----------------------------|
| Ni                       | 45-1027  | Hexagonal      | P63/mmc     | 2.6515×2.6515×4.343         |
| Co                       | 05-0727  | Hexagonal      | P63/mmc     | 2.5031×2.5031×4.0605        |
| Mn                       | 17-0910  | Tetragonal     | I4/mmm      | 2.672×2.672×3.55            |
| $\text{NiF}_2$           | 22-0749  | Orthorhombic   | P42/mnm     | 4.56×4.77×3.065             |
| $\text{CoF}_2$           | 38-0883  | Cubic          | Pa-3        | 4.958×4.958×4.958           |
| $\text{MnF}_2$           | 34-1326  | Tetragonal     | P-42m       | 5.112×5.112×5.256           |
| $\text{NaF}$             | 36-1455  | Cubic          | Fm-3m       | 4.63329×4.63329×4.63329     |
| $\text{KF}$              | 36-1458  | Cubic          | Fm-3m       | 5.34758×5.34758×5.34758     |
| $\text{Na}_2\text{CO}_3$ | 25-0815  | Hexagonal      | P63/mc      | 5.215×5.215×6.584           |

(c)

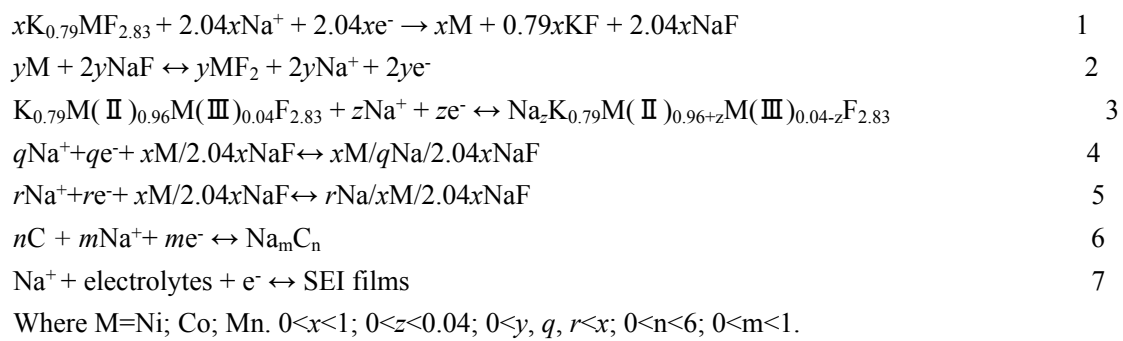

**Figure S16.** Schematics of reaction mechanisms for the KNCMF@rGO electrode during the discharging/charging processes under the first two cycles (a); Crystalline structure information of Ni, Co, Mn,  $\text{NiF}_2$ ,  $\text{CoF}_2$ ,  $\text{MnF}_2$ ,  $\text{NaF}$ ,  $\text{KF}$ , and  $\text{Na}_2\text{CO}_3$  phases (b), and reaction equation 1-7 (c).

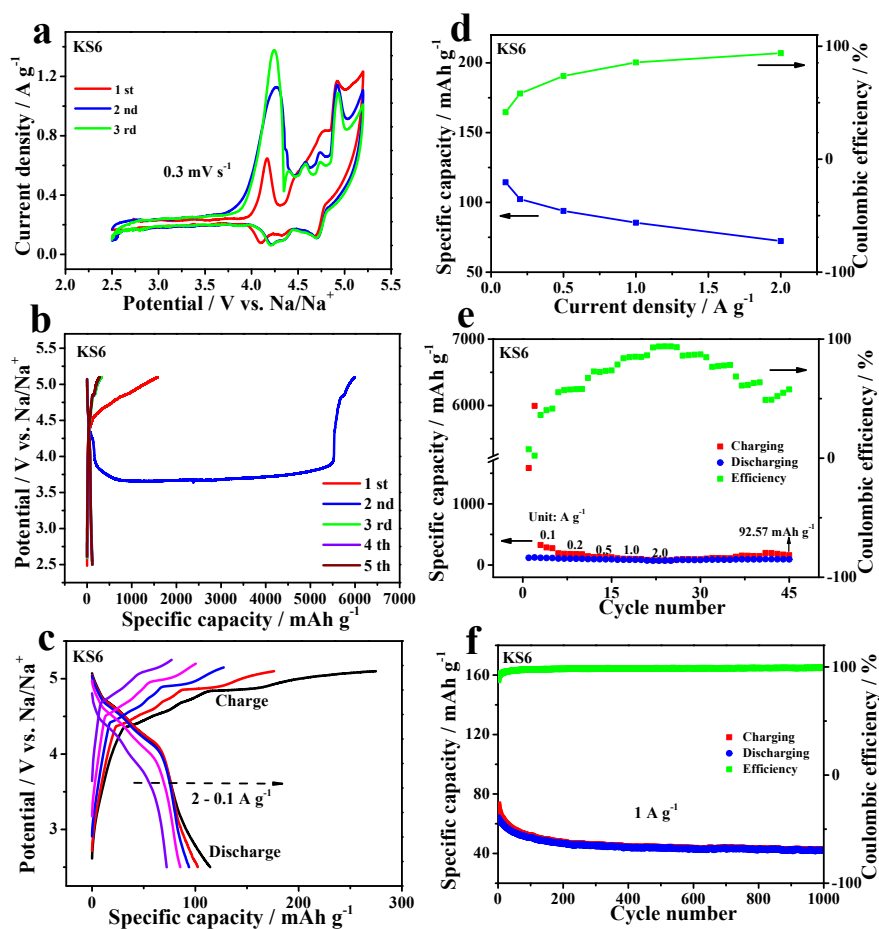

**Figure S17.** Performance of the KS6 electrode: CV plots for the first three cycles at 0.3 mV s<sup>-1</sup> (a), GCD curves for the first five cycles at 0.1 A g<sup>-1</sup> (b), GCD curves at 0.1-2.0 A g<sup>-1</sup> (c), specific capacity/rate capability and coulombic efficiency at 0.1-2.0 A g<sup>-1</sup> (d)(e) and cycling behavior at 1 A g<sup>-1</sup> (f).

**Figure S17a-f** illustrate the performance of the KS6 electrode. **Figure S17a-c** show the CV plots for the first three cycles at 0.3 mV s<sup>-1</sup> (a), GCD curves for the first five cycles at 0.1 A g<sup>-1</sup> (b) and GCD curves for the 5th cycle at 0.1-2.0 A g<sup>-1</sup> (c), which show more than three pairs of redox peaks and charging/discharging plateaus, indicating the multi-steps co-insertions of PF<sub>6</sub><sup>-</sup> anions and solvents in the graphite layers. **Figure S17d-f** show the specific capacity, rate capability and cycling behavior, which exhibit the specific capacity values of 114.4-72.3 mAh g<sup>-1</sup> at 0.1-2.0 A g<sup>-1</sup> and 66 % retention for 1000 cycles at 1 A g<sup>-1</sup> (**Table S4**). Such an excellent performance of KS6 can be a good positive electrode material used in Na-DIBs and will contribute to the advanced performance of the KNCMF@rGO//KS6 Na-DIBs.

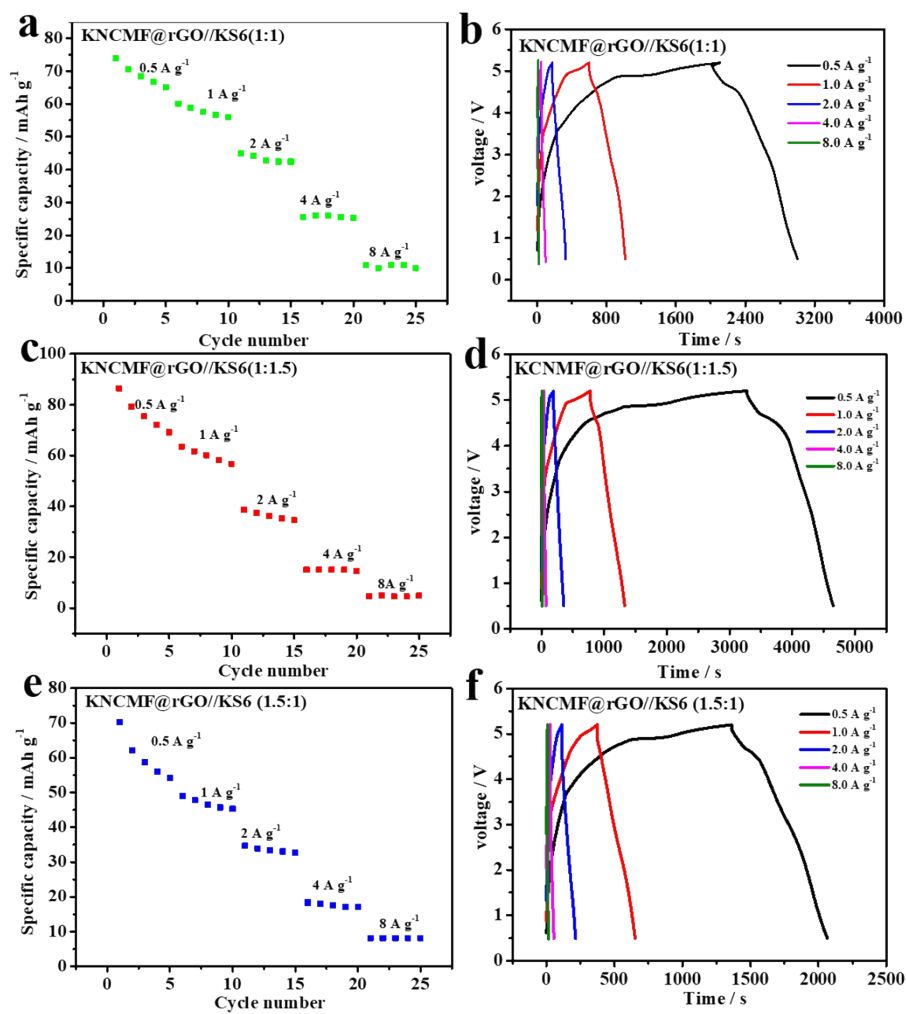

**Figure S18.** Specific capacity at 0.5-8 A g<sup>-1</sup> (a) (c) (e), GCD curves at 0.5-8.0 A g<sup>-1</sup> (b) (d) (f) of the KNCMF@rGO//KS6(1:1/1.:5/1.5:1) Na-DIBs.



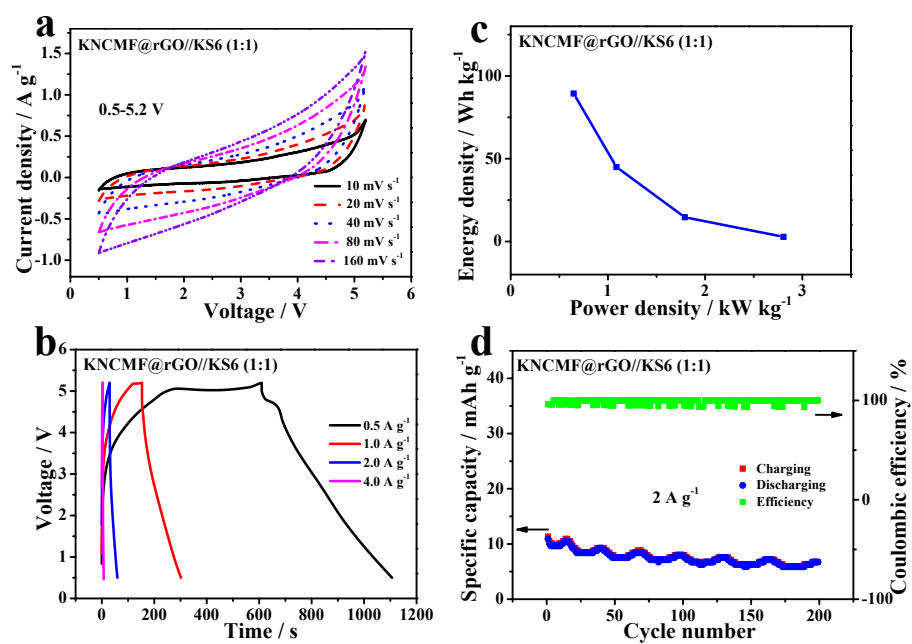

**Figure S19.** Performance of the Na-DIBs (KNCMF@rGO//KS6) under low ( $-20\text{ }^{\circ}\text{C}$ ) temperature: CV plots at 10-160  $\text{mV s}^{-1}$  (a), GCD curves at 0.5-4.0  $\text{A g}^{-1}$  (b), Ragone plots (c) and cycling behavior (d).

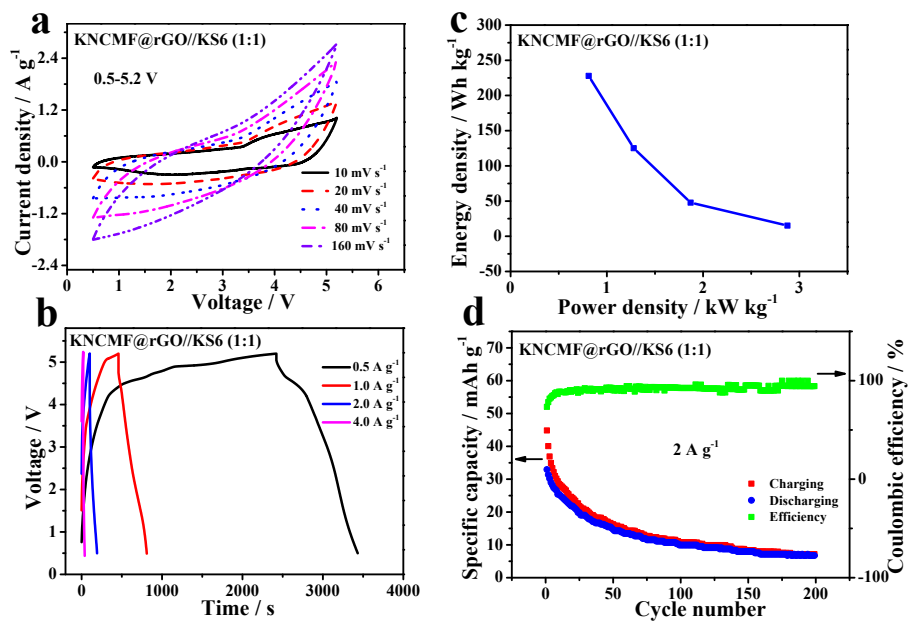

**Figure S20.** Performance of the Na-DIBs (KNCMF@rGO//KS6) under high (40 °C) temperature: CV plots at 10-160  $\text{mV s}^{-1}$  (a), GCD curves at 0.5-4.0  $\text{A g}^{-1}$  (b), Ragone plots (c) and cycling behavior (d).

**Table S1.** Materials, chemicals, and reagents used in this study.

| Materials, chemicals and reagents       | Type                 | Company                             | Characteristics                                                                                                                           |
|-----------------------------------------|----------------------|-------------------------------------|-------------------------------------------------------------------------------------------------------------------------------------------|
| <b>NiCl<sub>2</sub>•6H<sub>2</sub>O</b> | AR                   | SinoPharm                           | Purity≥98.0%                                                                                                                              |
| <b>CoCl<sub>2</sub>•6H<sub>2</sub>O</b> | AR                   | SinoPharm                           | Purity≥99.0%                                                                                                                              |
| <b>MnCl<sub>2</sub>•4H<sub>2</sub>O</b> | AR                   | SinoPharm                           | Purity≥99.0%                                                                                                                              |
| <b>KF•2H<sub>2</sub>O</b>               | AR                   | SinoPharm                           | Purity≥99.0%                                                                                                                              |
| <b>PVP-K30</b>                          | GR                   | SinoPharm                           | #                                                                                                                                         |
| <b>EG</b>                               | AR                   | SinoPharm                           | Purity≥99.0%                                                                                                                              |
| <b>Graphite</b>                         | TiMCAL- KS6          | TiMCAL                              | D90: 5.8-7.1 μm; Interlayer distance: 0.3354-0.3360 nm; SSA: 20 m <sup>2</sup> g <sup>-1</sup> ; Density-Scott: 0.07 g cm <sup>-3</sup> ; |
| <b>Graphene oxide (GO)</b>              | Power                | ZhengZhou<br>JingHong New<br>Energy | 3-10 floors<br>Conductivity: 2.0*10 <sup>5</sup> S m <sup>-1</sup><br>SSA: 150~200 m <sup>2</sup> g <sup>-1</sup>                         |
| <b>Acetylene black</b>                  | Battery grade        | #                                   | #                                                                                                                                         |
| <b>Superconductive carbon black</b>     | ECP-600 JD           | ShenZhen<br>YuLong                  | Average Diameter: 34nm;<br>SSA: 1400 m <sup>2</sup> g <sup>-1</sup>                                                                       |
| <b>NMP</b>                              | AR                   | Kermel                              | Purity≥99.0%                                                                                                                              |
| <b>PVDF</b>                             | Battery grade        | #                                   | #                                                                                                                                         |
| <b>Electrolytes</b>                     | Na206-181224         | MJS                                 | 0.85 M NaPF <sub>6</sub> /EC: EMC: DEC<br>(1:1:1)/5% FEC                                                                                  |
| <b>Na tablets (Homemade)</b>            | Battery grade        | #                                   | #                                                                                                                                         |
| <b>Cu foil</b>                          | 200*0.015            | GuangZhou<br>JiaYuan                | Total thickness: 15 μm;<br>Weight: 87 g m <sup>-2</sup>                                                                                   |
| <b>Carbon coated-Al foil</b>            | 222*0.015            | GuagZhou<br>NaNuo                   | Total thickness: 17 μm;<br>Strength: 192 Mpa                                                                                              |
| <b>Glass microfiber filters</b>         | GF/D 2.7 μm 1823-025 | Whatman                             | Diameter: 25 mm;<br>Thickness: 675 μm;<br>Weight: 121 g m <sup>-2</sup>                                                                   |
| <b>Cell components</b>                  | CR-2032              | ShenZhen<br>TianChenHe              | #                                                                                                                                         |

**Table S2.** Specific capacity and cycling retention of the KNCMF@rGO electrode.

| <b>Current density / (A g<sup>-1</sup>)</b>                         | <b>Specific capacity of KNCMF@rGO electrode (mAh g<sup>-1</sup>)</b> |
|---------------------------------------------------------------------|----------------------------------------------------------------------|
| 0.02                                                                | 208.4                                                                |
| 0.05                                                                | 161.8                                                                |
| 0.1                                                                 | 128.3                                                                |
| 0.2                                                                 | 98.1                                                                 |
| 0.5                                                                 | 68.3                                                                 |
| 1.0                                                                 | 43.9                                                                 |
| Cycling behavior Retention % /<br>0.3 A g <sup>-1</sup> / 500 cycle | 66%                                                                  |

**Table S3.** Specific capacity, rate capability and cycling retention of KNCMF@rGO, KNMF@rGO, KNCF@rGO, KCMF@rGO, KNF@rGO, KCF@rGO and KMF@rGO electrodes.

| Current density / (A g <sup>-1</sup> )                                         | Specific capacity (mAh g <sup>-1</sup> ) |          |          |          |         |         |         |
|--------------------------------------------------------------------------------|------------------------------------------|----------|----------|----------|---------|---------|---------|
|                                                                                | KNCMF@rGO                                | KNMF@rGO | KCMF@rGO | KNCF@rGO | KNF@rGO | KCF@rGO | KMF@rGO |
| <b>0.02</b>                                                                    | 208.4                                    | 250.6    | 125.3    | 209.8    | 238.7   | 164.0   | 75.2    |
| <b>0.05</b>                                                                    | 161.8                                    | 187.5    | 95.8     | 144.7    | 167.3   | 135.1   | 63.5    |
| <b>0.1</b>                                                                     | 128.3                                    | 146.1    | 76.9     | 112.0    | 125.0   | 116.0   | 54.4    |
| <b>0.2</b>                                                                     | 98.1                                     | 117.9    | 58.6     | 83.1     | 93.7    | 93.1    | 43.7    |
| <b>0.5</b>                                                                     | 68.3                                     | 81.9     | 39.3     | 57.2     | 64.8    | 67.8    | 29.6    |
| <b>1</b>                                                                       | 43.9                                     | 52.4     | 27.4     | 38.2     | 45.9    | 49.1    | 21.0    |
| <b>Rate capability (%)</b>                                                     | 21.1                                     | 20.9     | 21.9     | 18.2     | 19.2    | 29.9    | 27.9    |
| <b>Cycling behavior<br/>Retention % /<br/>0.5 A g<sup>-1</sup> / 500 cycle</b> | 54.0                                     | 94.1     | 69.5     | 48.6     | 30.9    | 84.9    | 78.0    |

**Table S4.** Specific capacity cycling retention of the KS6 electrode.

| <b>Current density / (A g<sup>-1</sup>)</b>                                    | <b>Specific capacity of KS6 electrode (mAh g<sup>-1</sup>)</b> |
|--------------------------------------------------------------------------------|----------------------------------------------------------------|
| 0.1 (2.5-5.1 V)                                                                | 114.4                                                          |
| 0.2 (2.5-5.1 V)                                                                | 102.3                                                          |
| 0.5 (2.5-5.15 V)                                                               | 93.9                                                           |
| 1.0 (2.5-5.2 V)                                                                | 85.5                                                           |
| 2.0 (2.5-5.25 V)                                                               | 72.3                                                           |
| Cycling behavior Retention % /<br>1 A g <sup>-1</sup> / 1000 cycle (2.5-5.2 V) | 66%                                                            |

**Table S5.** Comparison of electron binding energy of K2p and F1s.

| <b>Pristine state</b> | <b><math>\text{KNi}_{0.1}\text{Co}_{0.9}\text{F}_3</math></b> | <b><math>\text{KCo}_{0.54}\text{Mn}_{0.46}\text{F}_3</math></b> | <b><math>\text{K}_{1.1}\text{Zn}_{0.17}\text{Mn}_{0.83}\text{F}_{3.03}</math></b> | <b><math>\text{K}_{0.79}\text{Ni}_{0.25}\text{Co}_{0.36}\text{Mn}_{0.39}\text{F}_{2.83}\text{@rGO}</math></b> |
|-----------------------|---------------------------------------------------------------|-----------------------------------------------------------------|-----------------------------------------------------------------------------------|---------------------------------------------------------------------------------------------------------------|
| <b>K2p3/2</b>         | <b>292.8 eV</b>                                               | <b>293.5 eV</b>                                                 | <b>293 eV</b>                                                                     | <b>295.5 eV</b>                                                                                               |
| <b>K2p1/2</b>         | <b>295.8 eV</b>                                               | <b>296.3 eV</b>                                                 | <b>295.8 eV</b>                                                                   | <b>298.2 eV</b>                                                                                               |
| <b>F1s</b>            | <b>684.5 eV</b>                                               | <b>684 eV</b>                                                   | <b>684.5 eV</b>                                                                   | <b>687.58 eV</b>                                                                                              |
| <b>Refs.</b>          | <b>1</b>                                                      | <b>2</b>                                                        | <b>3</b>                                                                          | <b>This work</b>                                                                                              |

**Table S6.** Performance summary of the Na-DIBs in the study under room temperature (25 °C).

| Na-DIBs                       | Working voltage / V | Energy density / Wh kg <sup>-1</sup>   | Power density / kW kg <sup>-1</sup> | Cycling behavior / retention %, repeated cycles, current density                                                        |
|-------------------------------|---------------------|----------------------------------------|-------------------------------------|-------------------------------------------------------------------------------------------------------------------------|
| <b>KNCMF@rGO//KS6 (1:1)</b>   | 0.5~5.2             | 229.64~184.31<br>114.69~54.22<br>16.96 | 0.84~1.59<br>2.68~4.15<br>6.1       | 74%/50/2 A g <sup>-1</sup><br>60%/100/2 A g <sup>-1</sup><br>44%/200/2 A g <sup>-1</sup><br>30%/500/2 A g <sup>-1</sup> |
| <b>KNCMF@rGO//KS6 (1:1.5)</b> | 0.5~5.2             | 262.18~177.86<br>88.67~29.38<br>7.03   | 0.68~1.17<br>1.95~3.08<br>4.78      | 50%/50/2 A g <sup>-1</sup><br>40%/100/2 A g <sup>-1</sup><br>33%/200/2 A g <sup>-1</sup>                                |
| <b>KNCMF@rGO//KS6 (1.5:1)</b> | 0.5~5.2             | 190.16~ 130.83<br>80.72~33.72<br>12.53 | 0.97~1.69<br>2.89~4.63<br>6.27      | 61%/50/2 A g <sup>-1</sup><br>47%/100/2 A g <sup>-1</sup><br>37%/200/2 A g <sup>-1</sup>                                |



**Table S7.** Performance summary of the Na-DIBs in the study under low (-20 °C) and high (40 °C) temperature.

| Na-DIBs                     | Working voltage / V | Temperature (°C) | Energy density/ Wh kg <sup>-1</sup> | Power density/ kW kg <sup>-1</sup> | Cycling behavior/ retention %, repeated cycles, current density |
|-----------------------------|---------------------|------------------|-------------------------------------|------------------------------------|-----------------------------------------------------------------|
| <b>KNCMF@rGO //KS6(1:1)</b> | 0.5~5.2             | -20 °C           | 89.38~44.93                         | 0.65~1.09                          | 69%/50/2 A g <sup>-1</sup>                                      |
|                             |                     |                  | 14.62~2.81                          | 1.79~2.81                          | 73%/100/2 A g <sup>-1</sup><br>62%/200/2 A g <sup>-1</sup>      |
| <b>KNCMF@rGO //KS6(1:1)</b> | 0.5~5.2             | 40 °C            | 227.81~125.08                       | 0.81~1.28                          | 45%/50/2 A g <sup>-1</sup>                                      |
|                             |                     |                  | 47.81~15.18                         | 1.87~2.88                          | 30%/100/2 A g <sup>-1</sup><br>20%/200/2 A g <sup>-1</sup>      |

**Table S8.** A comparison for the performance of the KNCMF@rGO//KS6 in the study with some reported Na (Li)-DIBs.

| Na (Li) -DIBs                                | Working voltage / V | Energy density / Wh kg <sup>-1</sup>                        | Capacity / mAh g <sup>-1</sup>                                                                    | Power density/ kW kg <sup>-1</sup>                 | Cycling behavior/ retention%, repeated cycles, current density        | Refs.            |
|----------------------------------------------|---------------------|-------------------------------------------------------------|---------------------------------------------------------------------------------------------------|----------------------------------------------------|-----------------------------------------------------------------------|------------------|
| Sn//Graphite (Na-DIBs)                       | 2.0-4.8             | 144-111                                                     | #                                                                                                 | 0.15-0.793                                         | #                                                                     | 4                |
| MoS <sub>2</sub> //Carbon-Graphite (Na-DIBs) | 1.0-4.0             | #                                                           | 65 (0.1 A g <sup>-1</sup> )                                                                       | #                                                  | 85%/200/0.1 A g <sup>-1</sup>                                         | 5                |
| Si-compound //Graphite (Li-DIBs)             | 0-3.0               | 54                                                          | #                                                                                                 | #                                                  | 53%/100/0.1 A g <sup>-1</sup>                                         | 6                |
| RGO//Graphite (Li-DIBs)                      | 0-4.0               | 70                                                          | #                                                                                                 | 1.33                                               | 74%/50/1.33 A g <sup>-1</sup>                                         | 7                |
| <b>KNCMF@rGO//KS6 (Na-DIBs)</b>              | <b>0.5-5.2</b>      | <b>229.64~184.31</b><br><b>114.69~54.22</b><br><b>16.96</b> | <b>68.49~57.56</b><br><b>42.86~26.05</b><br><b>10.92</b><br><b>(0.5/1/2/4/8 A g<sup>-1</sup>)</b> | <b>0.84~1.59</b><br><b>2.68~4.15</b><br><b>6.1</b> | <b>74%/50/2 A g<sup>-1</sup></b><br><b>60%/100/2 A g<sup>-1</sup></b> | <b>This Work</b> |

## References

1. Q. L. Xu, R. Ding, W. Shi, D. F. Ying, Y. F. Huang, T. Yan, P. Gao, X. J. Sun and E. H. Liu, *J. Mater. Chem. A*, 2019, **7**, 8315-8326.
2. D. F. Ying, R. Ding, Y. F. Huang, W. Shi, Q. L. Xu, C. N. Tan, X. J. Sun, P. Gao and E. H. Liu, *J. Mater. Chem. A*, 2019, **7**, 18257-18266.
3. D. F. Ying, Q. L. Xu, R. Ding, Y. F. Huang, T. Yan, Y. X. Huang, C. N. Tan, X. J. Sun, P. Gao and E. H. Liu, *Chem. Eng. J.*, 2020, **388**, 124154.
4. M. H. Sheng, F. Zhang, B. F. Ji, X. F. Tong and Y. B. Tang, *Adv. Energy Mater.*, 2017, **7**, 1601963.
5. H. L. Zhu, F. Zhang, J. R. Li and Y. B. Tang, *Small*, 2018, **14**, 1703951.
6. H. Nakano, Y. Sugiyama, T. Morishita, M. J. S. Spencer, I. K. Snook, Y. Kumai, H. Okamoto, *J. Mater. Chem. A*, 2014, **2**, 7588-7592.
7. X. Y. Shi, W. Zhang, J. F. Wang, W. T. Zheng, K. K. Huang, H. B. Zhang, S. H. Feng, H. Chen, *Adv. Energy Mater.*, 2016, **6**, 1601378.
